CORRECTION

# Correction: Wild-Type Mouse Models to Screen Antisense Oligonucleotides for Exon-Skipping Efficacy in Duchenne Muscular Dystrophy

Limin Cao, Gang Han, Ben Gu, HaiFang Yin

[S2 Fig](#) contains incorrectly duplicated panels. The authors have provided a corrected version here.

## Supporting information

**S2 Fig. Routine hematoxylin and eosin staining for examining muscle morphology.** Hematoxylin and eosin staining of TA tissue sections from treated *C57BL6* mice with 2 µg PMO, 5 µg PNA and 5 µg 2'Ome PS by local injection at different time-points e.g. 48 hr, 2 and 4 weeks after injection, and *C57BL6* normal controls. Scale Bar = 100 µm. No difference was observed between treated and untreated *mdx* mice. (TIF)

## Reference

1. Cao L, Han G, Gu B, Yin H (2014) Wild-Type Mouse Models to Screen Antisense Oligonucleotides for Exon-Skipping Efficacy in Duchenne Muscular Dystrophy. PLoS ONE 9(11): e111079. <https://doi.org/10.1371/journal.pone.0111079> PMID: 25365558

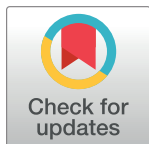

## OPEN ACCESS

**Citation:** Cao L, Han G, Gu B, Yin H (2018) Correction: Wild-Type Mouse Models to Screen Antisense Oligonucleotides for Exon-Skipping Efficacy in Duchenne Muscular Dystrophy. PLoS ONE 13(11): e0207817. <https://doi.org/10.1371/journal.pone.0207817>

**Published:** November 15, 2018

**Copyright:** © 2018 Cao et al. This is an open access article distributed under the terms of the [Creative Commons Attribution License](#), which permits unrestricted use, distribution, and reproduction in any medium, provided the original author and source are credited.
